# Supplementary material
Source: PubMed Central journal article supplement (PMC4497868)
Supplement: NIHMS695858-supplement.pdf [file NIHMS695858-supplement.pdf]

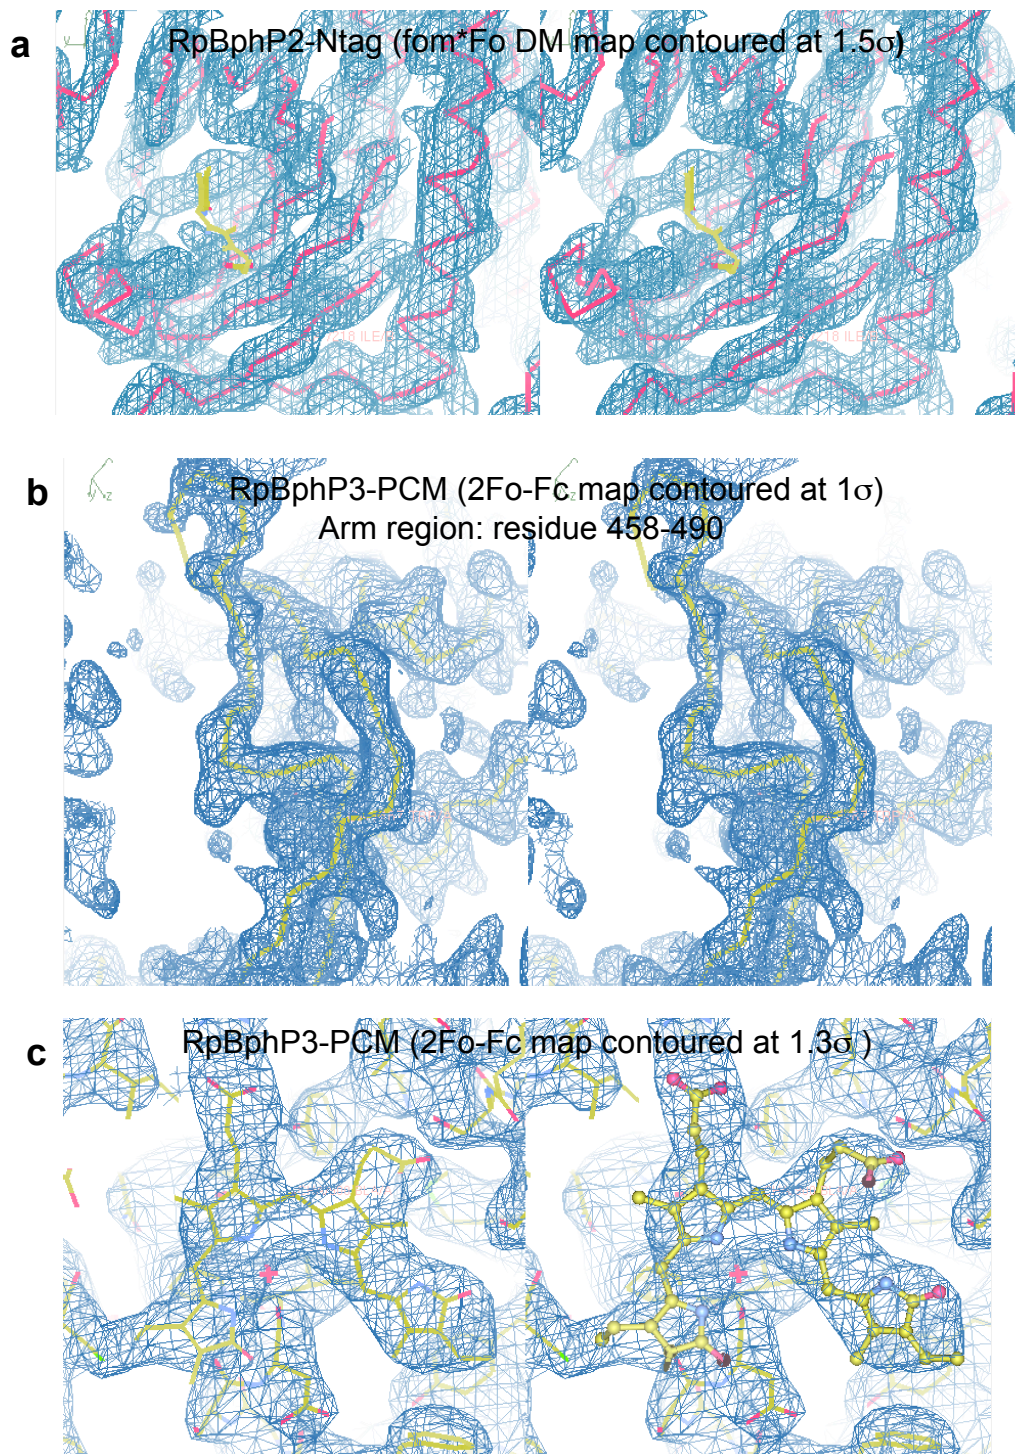

**Figure S1. The electron density maps in stereo-view.** a) The figure-of-merit weighted experimental SAD map of RpBphP2-Ntag following density modification (PDB ID 4S21). The chromophore is colored in yellow. b) The 2Fo-Fc map in the arm region of the subunit A of the RpBphP3-PCM structure (PDB ID 4R70); c) 2Fo-Fc map of the chromophore binding pocket in RpBphP3-PCM. The biliverdin chromophore is highlighted in ball-and-stick. Related to Figure 1 and Figure 4.

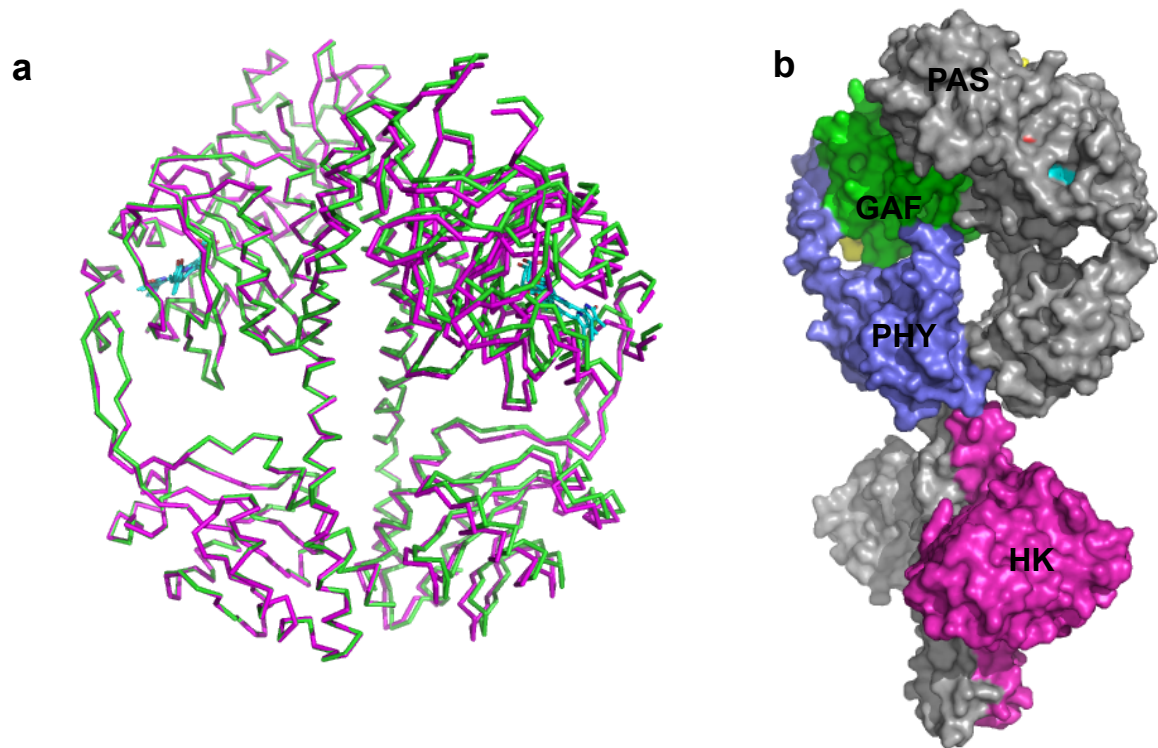

**Figure S2. The dimer scaffold and full-length modeling of RpBphP2.** a) Superposition of the RpBphP2-Ctag (green) and RpBphP2-Ntag (magenta) structures according to least square fitting of molecule A (monomer at left) shows a slight displacement in molecule B (monomer at right). Related to Figure 1a. b) A surface representation of the full-length RpBphP2 model in the Pr state. One RpBphP2 monomer is colored in solid grey, and the other is colored according to their individual domains (PAS, yellow; GAF, green; PHY, blue; and HK, magenta).

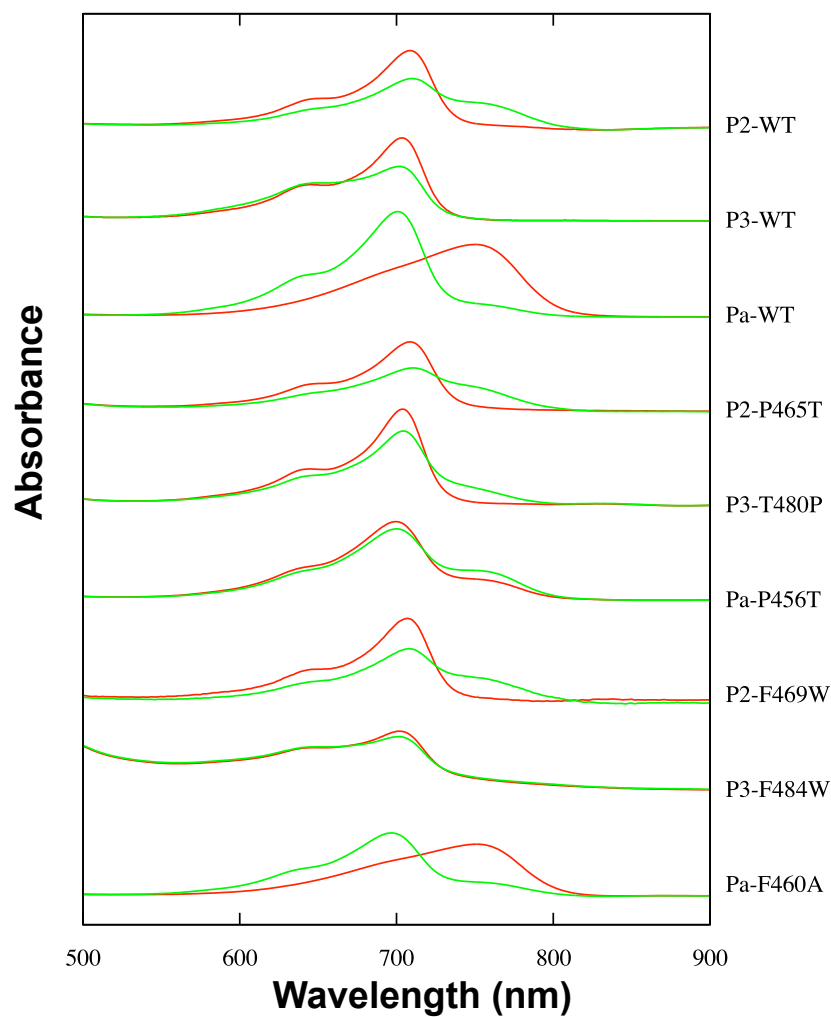

**Figure S3. Absorption spectra** of RpBphP2 (P2), RpBphP3 (P3) and PaBphP (Pa) wild type (WT) and mutants in the PRxSF motif. Dark-adapted spectra are colored in red, and light-induced spectra measured after 5-min illumination are shown in green curve. Related to Figure 4.



a

```
UniRef90_B6BFK0 PR T S F D K W V N E H D D Q S L P W E E A E L Q A A R E I F Q E F L D I I S S Q L - - - - L L K E E N S S L R - - - - - R F A H M A A H D L -
UniRef90_A2TTK4 PR K S F E K W N Q E Q V L T S L P W K D Y E I A S A Q A L K T S I S N I I I S R Y Q E V K E L - - - - N D K L K E A Y K E L E S F S Y S V S H D L -
UniRef90_Q20ZX2 - R A S F D A W R E E V R G R S K P W Q T Y E I A A A V E I R D L V D V I L G R A D - A L E H A N R E L S R S N D E L - - - - E S F A Y V A A H D L -
UniRef90_Q132M8 PR R S F A K W N Q V V E G T S D P W T P A D L A A V R T I G Q S V A D I V L Q F R A V R T - - L I A - - - - Q E R L D Q F S R Q V L T S D H K I I
UniRef90_Q882H5 PR Q S F D V W K Q E V T G I A R P W S R A D L Y G A E D I R S A L E S D L E R Q V Q R E Q E A V - - - - R L R D E L - - - - - V A V V S H D L -
UniRef90_Q15YT5 PR S S F R L W R E N V K N Q S L A W E A V E L S S A L K F R D T I V N Y V I S K - S E R L E L L N E A L E A V R D E L K E L E R F A F V A S H D L -
UniRef90_B0JT05 PR K S F S L W K E T V R L K S L P W K A V E I N A A L E L R K A I Q A D E L A R L A R D L E L S N A E L K K - - - - - F A Y V A S H D L Q
UniRef90_Q7CY45 PR K S F E I W K E Q L R N T S F P W S E P E L A A A R E L R G A I I G I V L R K T E E M A D L T R E L Q R - - - - T N K E L E A F S Y S V S H D L -
UniRef90_B7KIT7 PR Q S F Q L W K E E V K G K S L P W K T T E L N A A L N L R N S I L E V G I - W K A N D L M L L N A E L E R S N - - - - Q D L D A F A Y I A S H D L -
UniRef90_B2T288 PR E S F A V W T D T V R G R S P A W R P A E L E I A V E F R T A L L G I V L A Q L A L E L G R A N K E L - - - - - E G F S Y T V S H D L -
UniRef90_B2J2D1 PR K S F E L W K E T V R L T S L P W K D V E V K A A L E L R V L R Q A D E L A Q L A Q D L E R S N A E L K K - - - - - F A Y V A S H D L -
UniRef90_B8HKH3 PR Q S F A L W K E T V R L K S L P W Q A V E V K A A L E F R K A I V N I V L A L L A Q D L E R S N A E L K K - - - - - F A Y V A S H D L Q
UniRef90_UP10001A4B1A PR K S F D V W T D I V R G Y S P P W R Q A B R E I A L E F R A A L L G I V L R R A E E L A D L A L E L G R - - - - A N Q E L E G F S Y T V S H D L -
UniRef90_A3IMT6 PR N S F K Q W K E I V D G K S L P W Q T I E I E T A L E L R K S I L E M G F K Q M N K - L T K L N D E L Q Q - K N - - - - Q D L D A F A Y I A S H D L -
UniRef90_UP1000038268 PR T S F E I W K V E M A G I S T K W S H G D L F A A N D L R S A L E N D L A R Q V R R E Q E A V R A - - - - R D E L - - - - - V A V V S H D L -
UniRef90_UP10000383C5 PR R S F E R W V E Q K H G H S A R M L S W B E I Q V A G A L A T A M T K V I L R Q - - - - - N R R I K T L N G E V E R F L W V T S H H L -
UniRef90_A02C04 PR K S F S L W Q E T V K G R S R P W L T C E Y H A A R E L R Q A I I - L E H F V R H T E Q L V R L N A D L Q E - R N - - - - S Q L D A F A Y I A S H D L -
UniRef90_Q55168 PR Q S F D L W K E I V R L Q S L P W Q S V E I Q S A L A L K K A I V N L I L R Q A - E E L A Q L A R N L E R S N - - - - A D L K K F A Y I A S H D L -
UniRef90_Q07T25 PR S S F A A W T E E V H G R A L S W E A H E I A A A V E I R D L V I D V I L - R N T E K L E R I N S Q L A R S N E E L - - - - E A F A H V A S H D I -
UniRef90_B8HJX5 PR K S F A L W Q E T V R G H A L P W K A A E I E A V T E L R S L I V G I V L R Q A D E - M A L M N F E L Q R S N E E L - - - - D S F A Y I A S H D L -
UniRef90_B4RFA1 PR Q S F R L W K E Q V R Q R S A P W T L S E I E S A R S F R A S I Q N F V L R R A E E R A E L T - - - - S R L V E I N R E L E S F S Y S I S H D L -
UniRef90_Q097N3 PR K S F E L W K E T V R G R C L P W K A Y E V E A A S E L R R S I I D V A L Q R - S E E L L K L M T E L E R S N V E L - - - - D A F A Y A A S H D L -
UniRef90_B0UDE6 PR R S F E I W K E T V Q G R S L P W S E A E I D A A K D L R A A V L G I V L - R R A E E L A A M T D E L T R S N K E L - - - - E A F S Y S V S H D L -
UniRef90_A4ZU6 PR Q S F A R W V E V R R G H S R P W P R W K E I A R S L R T A L N D V I L R Q L R T - I R L N A E S D R A K - - - - - S R F L A H M S H E L -
UniRef90_B2FRG9 PR N S F E A W K E T V Q Q R S L P W S D A D C D A A H E M R T A I V D I V L R K A E E M A E - L N E Q L L R S N K E L - - - - E A F S Y S V S H D L -
UniRef90_A0ZC04 PR K S F D L W K E T V L L K S V P W K T S Y E V N A A R E L R Q A I I G I V V L R K A D E - L A Q L N I E L E R S N H E L - - - - D A F A Y I A S H D L -
UniRef90_B4WKH0 PR Q S F E R W Q Q T V I G R S L P W K E C E V E A A L E L R T A V I G L V L Q K A D E - L S Q L N S E L E R S N V E L - - - - D S F A Y I A S H D L -
XabpHP PR K S F D L W Q Q T V R G R A R R W S P L H L E S A R S L R V L I E L M E R K R F Q D D F T L L E A S L S R L R D G V A - - - - F E R G A K G A A H R L M
UniRef90_A4VS53 PR H S F E R W Q E T L R G Y S H A W D Q V E I E G A L E L R V L R K A E E M A Q L A G E L R A S N K E L - - - - - E A F S Y S V S H D L -
UniRef90_A3XMS7 PR K S F E A W S V Q Q E G K S A P W Q E Y E I T A A E A L K Q D I S E I I L E K Y D E I K E L H N L L K V A Y E D - - - - L E T F S Y S V A H D L -
UniRef90_Q8RTM9 PR K S F D L W K E I V Q R Q S L P W E S Y E I E A V W F R S A I V G V V L R K A D E - L A K M N V E L Q R S N D E L - - - - D A F A Y I A S H D L -
UniRef90_B2W63 PR K S F E H W Q E T V R L T S L P W K G C E L S E A L S N A I V G I V L S K A D E - L A K I N L E L E R S N Q E L A - - - - S F A Y A A S H D L -
UniRef90_B7JU6 PR H S F A W K E V V N K S L A W E S L E I E A A Q E L K N T L L L A A L E F S K Q S Q V I L - E E K T R Q A N A A N L A K S F L A K M S H E L -
UniRef90_Q1877 PR H S F E R W Q E E V R G F S A A W H P L T L E G V R L G A V L G I V L - R K A E E L A Q L A G E L K R S N K E L - - - - E A F S Y S V S H D L -
UniRef90_A4A1X6 PR K S F E T W R E I V R D H S R K W S T V D R D M A L E L H N G L - A E L G R R A I E L T R I N E E L S R I N - - - - A D L D S F A F A A S H D L -
UniRef90_Q4LBM8 PR V S F E Q W Q Q T V R G F S T P W L P S E T E G V E L S R L R K A E E L A Q M S E D L K V S N K E L - - - - - E A F S Y S V S H D L -
UniRef90_A6EDC8 PR K S F E A W Q E V V T G Q S M P W K A S E L R A A E L R I T L L E V L R R A R E Q E L L I A E L N R V R N I L N L I R G L V S Q G R D - -
UniRef90_Q07RY9 PR R S F A Q W H Q V V E G T S E P W S P A D L A A A R L I G Q T V V D I V L Q F R A V R T L I A Q D Q L E K F - - - - - S R Q V G V S D H R I I
UniRef90_Q4K656 PR T S F E I W K V E M A G I S T K W S H G D R F A A N D L R R S A L E H D L A R - - - - Q V L R E Q Q A V R A R D E L - - - - - V A V V S H D L -
UniRef90_A6EDC8 PR H S F E S W A Q L V K N T S A K W T A V E I T A V L R L R E K I - L Y A V N K K A S E I R I L N E - - - - R L K M A Y E E L D T F S Y T V S H D L -
UniRef90_A3WGK7 PR G S F D A W E Q T V E G C S E E W S D D E L Q I A E G L R V L L E I V E R K K A Q E Q Q E L L I A E L N R V R N I L N L I S S Q S Q G A A H D V -
UniRef90_UP100016C4DF PR K S F E T W S Q T V R D K A V P W L P S E V A G A G E L R N A V L G I V L - R K A E E M A A L N V E L Q R S N R E L - - - - E A F S Y S V S H D L -
UniRef90_C1F220 PR H S F E G W S E L V R Q R S D A W S A V E I E A A R F R N A M L F I V L R R A E E L A D M A A E L - E F T N - - - - K E L E A F S Y S V S H D L -
UniRef90_B4WLJ5 PR Q S F E R W K E S I H N Q S L P W Q S N E V V A A H E L H L L L A A L E F S Q A S L K R V A S E A T A N R A K - - - - - S Q F L A K M S H E L -
UniRef90_B4AUL9 PR R S F E L W K E T V S Q S L P W Q Q I E I D A A Y Q L R L L L A A L E F S Q S T A L Q K A A E R A E I N R A K S E - - - - - F L S R V S H E L -
UniRef90_A5FCX0 PR N S F N I W K Q I I K N Q S N T W K Q Y E I N T A H T L H N H L M L M I L S K E E E K Y R T Q S E V L - - - - K E T N S E L E N I N W I S T H D L -
UniRef90_C1V287 PR K S F A L W E E I V R G R S Q P W T P L E L E M V R R L R N A V A T A A L Q R D A Q - L R R L N A E L A R S N E D L - - - - D A F A Y V A S H D L -
UniRef90_Q137Y0 PR N S F A L W K E S V R N R S I P W R D D E K E A V A R L A A A I G D I V A E R A - T R V E R I S R E L G G A R S E L G - - - - H Y A D T A S H E L -
UniRef90_C0TJX3 PR G S A V Y R A V A R G R C L P W T A A D E A V A V E F G H A V T T V A L R H T T H - L T G L N D E L R R V N - - - - A D L D T F T H V A A - - -
UniRef90_B1VL07 PR G S A A V Y R A T V R G R S A P W S P A Q R V V A G E L R E V S G L L T R Q V V A - - - - L E A R N T E L A R T N E D L - - - - D S F A H A A A H D L -
UniRef90_B1J6D2 PR H S F E H W Q E Q L G G Y C E P W D P L T I E G V V E L R T A V L G I V L R K A E E M A Q L A N - E L R R S N K E L - - - - E A F S Y S V S H D L -
UniRef90_C1D3W9 PR A S F E A Y V Q Q V R H T A L E W H P G E V A E A E S M R D A L V E T Q L Q R A H D A L G R S N A E L Q R R N E E L A - - - - Q F A Y V A S H D L -
UniRef90_B5W221 PR Q S F E A W K E T V S G H A L G W N E L E I N A A M E L R L M L A V L H F S H F A L E E V A K R A E M N R A K S E - - - - - F L A N M S H E I -
UniRef90_C0YPD3 PR T S F R I F T E N I K G Q S K R N N S R N I S A V Q T V R D I - L E T S H K N Y N A I K R L N D E L K K V N E E L - - - - D S F S Y T I S H D L -
UniRef90_B0C1J9 PR S S F A E Y R E T V A G Q C Q S W S S L D T E A A L E L R T D L G L M L A I S R Q R Q D D L L A E L N R V K N I L A L I R S I S R Q T R E - - -
UniRef90_B3Q6E9 PR N S F A L W K E S V Q G R A V P W R D D E K D A A T Q L A A A I A E I A I E R I N R A L D A S H S E L S R Y T D V A A E L K E H L R G I H E - - -
UniRef90_B2J2J0 PR Q S M A Q W Q A L K E D K A H P W S I E E M E L Q S L N I H L S L A V I Q E R Q R L E M H N E A L S H A R A A A E E V S R F L A S T S H E L -
UniRef90_C1D220 PR R S F E T Y E Q T V R G H A E P W H A G E I E A Q E L Q R A L T A - A L G E R L S V R S L N E A L E R S N - - - - A E W R Q Y G F V I A H D M -
UniRef90_C2FUW2 PR T S F E T W R Q I T R G K A S V W L K V Q L L F L E R I V Y I I Q Q - A T A K R N A E I D Q L N K D L V R S N N A L - - - - D T F S Y T L T H D L -
UniRef90_Q9RZA4 PR H S E D T Y L E E K R G Y A E P W H P G E I E E A Q D L R D T L T G - A L G E R L S V I R D L N R A L T Q S N - - - - A E W R Q Y G F V I S H - - -
```

**b**

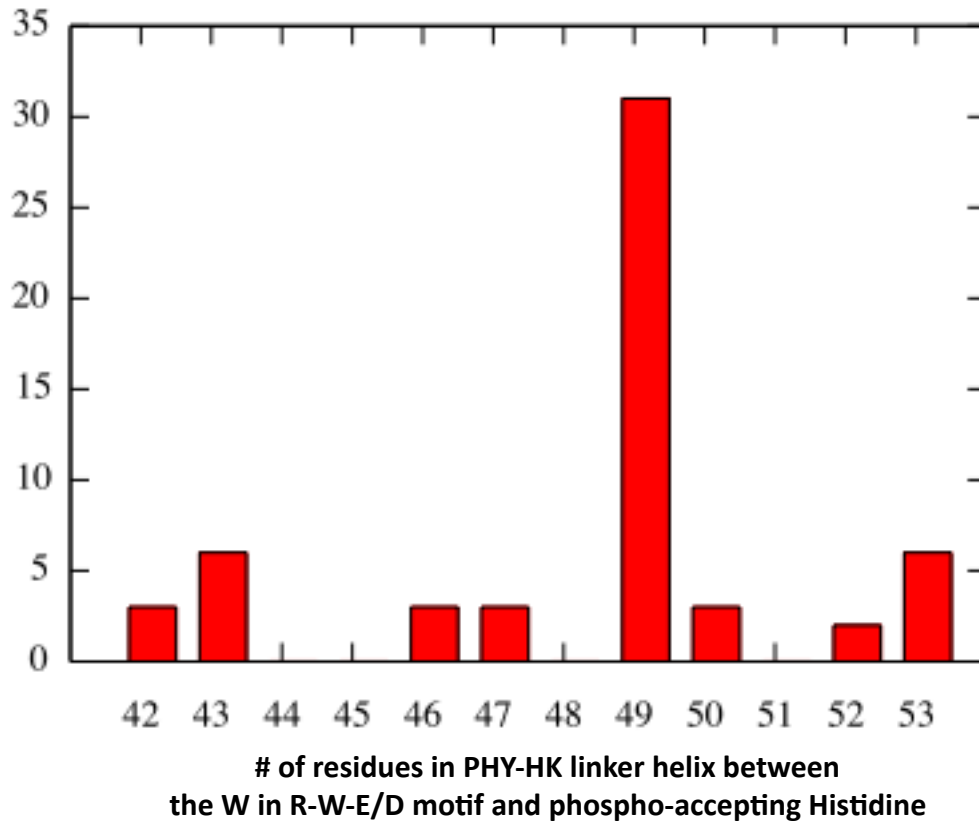

**Figure S4. The PHY-HK linker sequence.** a) Multiple sequence alignment in the range from the PRxSF motif to the phospho-accepting histidine in 60 putative BphP sequences retrieved from UniPROT. XaBphP (highlighted in grey and red dashed line) was used as query sequence (Jalview). b) Histogram of the helical length of the PHY-HK linker helix between the conserved Trp in the R-W-E/D motif and phospho-accepting histidine as measured by number of residues. Related to Figure 5.

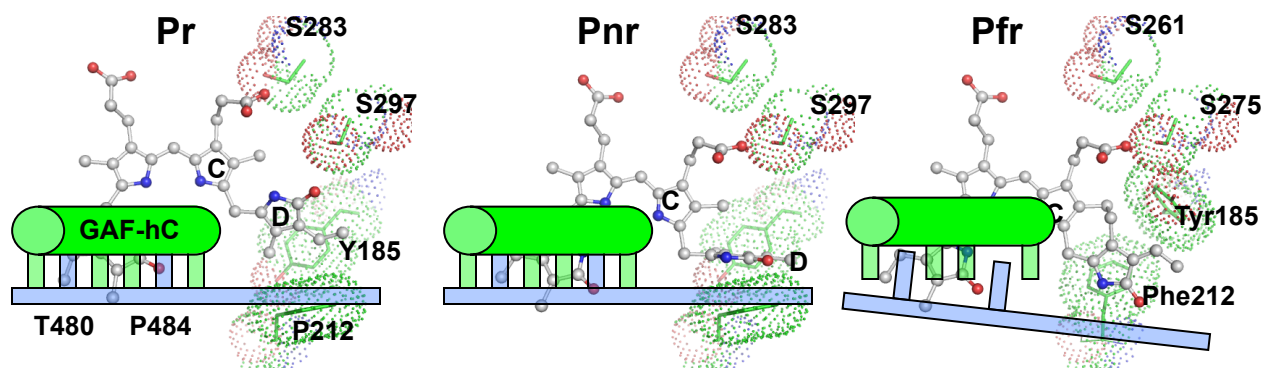

**Figure S5. Cartoon representations of the Pr, Pnr and Pfr state.** The RpBphP3-PCM crystal structure illustrates the Pr conformation. The PaBphP structure (PDB ID 3NHQ) illustrates Pfr. Structural analysis and mutational data in this work suggest the Pnr conformation. Compared to the Pr state, the chromophore undergoes an overall rotation relative to the protein matrix in the Pnr and Pfr states, in which the propionate group of ring C moves away from Ser283 and closer to Ser297. In the Pnr state, ring D disengages from the conjugated system of the chromophore due to steric hindrance arising from the “tongue-and-groove” interactions at the GAF-PHY interface (shown in a green cylinder representing the GAF-hC helix and a long blue bar representing the arm containing the PRxSF motif). In the Pfr state, the arm is dislodged allowing further relaxation of ring D to adopt the *ZZEssa* configuration. Related to Figure 4b.

**Table S1.** Inter-atomic distances at the GAF-PHY interface in RpBphP3-PCM and Cph1 (2VEA) calculated by the CCP4 contact program (related to Figure 4).

|         | <b>arm of PHY</b> | <b>GAF</b> | <b>Distance (Å)</b> |
|---------|-------------------|------------|---------------------|
| RpBphP3 | Thr460-O          | His211-N   | 2.94                |
|         | Gly262-N          | His211-O   | 3.18                |
|         | Arg477-NE         | Glu27-OE1  | 3.12                |
|         | Ala478-O          | Thr268-CG2 | 3.07                |
|         | Ala478-CB         | Thr268-OG1 | 3.15                |
|         | Thr480-OG1        | Thr268-O   | 3.18                |
|         | Thr480-OG1        | Tyr272-N   | 2.99                |
|         | Thr480-OG1        | Tyr272-CA  | 2.99                |
|         | Thr480-OG1        | Tyr272-CB  | 3.14                |
|         | Arg481-O          | Asn275-OD1 | 2.62                |
|         | Ala482-CA         | Asn275-OD1 | 3.14                |
|         | Ala482-C          | Asn275-OD1 | 2.96                |
|         | Ala482-O          | Asn275-OD1 | 2.68                |
|         |                   |            |                     |
| Cph1    | Asn449-O          | His202-N   | 2.74                |
|         | Gly451-N          | His202-O   | 2.90                |
|         | Tyr458-OH         | Ser11-OG   | 2.97                |
|         | Ile467-CB         | Gln14-OE1  | 3.19                |
|         | Ile467-CG2        | Gln14-OE1  | 3.16                |

**Table S2.** Equivalent residues among known phytochrome structures (related to Figure 4 and Figure 5).

| Structure<br>(PDB ID) | GAF-PHY interface |      |      | PRxSF motif |      |      |      | R-W-E/D motif |      |      |
|-----------------------|-------------------|------|------|-------------|------|------|------|---------------|------|------|
|                       |                   |      |      |             |      |      |      |               |      |      |
| RpBphP3               | Y272              | D216 | L207 | T480        | R481 | S483 | F484 | R452          | W498 | E502 |
| RpBphP2               | Y258              | D202 | Y193 | P465        | R466 | S468 | F469 | R439          | W483 | E487 |
| PaBphP                | Y250              | D194 | Y185 | P456        | R457 | S459 | F460 | R428          | W474 | D478 |
| Cph1                  | Y263              | D207 | Y198 | P471        | R472 | S474 | F475 | R441          | W489 | E493 |
| DrBphP                | Y263              | D207 | Y198 | P465        | R466 | S468 | F469 | R442          | W483 | E487 |
| RpBphP1<br>(4GW9)     | Y257              | D201 | Y192 | P465        | R466 | S468 | F469 | R437          | W483 | D487 |
| AtPhyB<br>(4OUR)      | Y361              | D307 | Y298 | P581        | R582 | S584 | F585 | R554          | W599 | E603 |
